# Supplementary material for: Technical note: A new online tool for δ 18 O-temperature conversions
Source: Copernicus journal article supplement (doi:10.5194/cp-2022-74), 2022-10-11
Supplement: Supplementary file [file cp-2022-74-RC1-supplement.pdf]

## Review figures:

**Table 1 - 2** *Palaeotemperature equations*

| Reference                            |                             | Material                                                                              | Calibration Temperature (°C) |         | Equation |      |          |       |                       | VSMOW to VPDB (‰) | Comments                                                                                                                                                                                                                           |
|--------------------------------------|-----------------------------|---------------------------------------------------------------------------------------|------------------------------|---------|----------|------|----------|-------|-----------------------|-------------------|------------------------------------------------------------------------------------------------------------------------------------------------------------------------------------------------------------------------------------|
| Original                             | Rearranged or reformated    |                                                                                       | Minimum                      | Maximum | a        | b    | (c - sw) | c     | (c - sw) <sup>2</sup> |                   |                                                                                                                                                                                                                                    |
| McCrea, 1950                         |                             | Synthetic calcite                                                                     |                              |         | 16       | 5.17 | o        | 0.09  | e                     | -0.2              |                                                                                                                                                                                                                                    |
| Epstein et al., 1953                 | (Epstein & Mayeda, 1953)    | Mollusk Shell                                                                         | 7.2                          | 29.5    | 16.50    | 4.30 | o        | 0.14  | o                     | -0.27             | Conversion is -0.27‰ as it was directly standardized with PDB-derived CO <sub>2</sub>                                                                                                                                              |
| -                                    | Craig, 1965                 | Mollusk Shell                                                                         |                              |         | 16.90    | 4.20 | o        | 0.13  | o                     | -0.20             |                                                                                                                                                                                                                                    |
| -                                    | Shackleton and Opdyke, 1973 | Mollusk Shell                                                                         | 7.2                          | 29.5    | 16.90    | 4.38 | o        | 0.13  | o                     |                   | Minor variant published in Maliszé and Caley, 2009                                                                                                                                                                                 |
| -                                    | Anderson and Arthur, 1983   | Mollusk Shell                                                                         | 7.2                          | 29.5    | 16.00    | 4.14 | o        | 0.13  | o                     |                   | Revision with δ <sup>18</sup> Ow referenced to VSMOW                                                                                                                                                                               |
| O'Neil et al., 1969                  | Shackleton, 1974            | Synthetic calcite                                                                     | 0                            | 500     | 16.90    | 4.38 | o        | 0.10  | o                     | -0.20             | Quadratic approximation from the original 1000lna notation, calibrated with Uvigerina                                                                                                                                              |
| -                                    | Hays and Grossman, 1991     | Synthetic calcite                                                                     | 0                            | 60      | 15.70    | 4.36 | o        | 0.12  | o                     |                   | Minor variant with correction of Friedman and O'Neil, 1977 (Grossman, 2012)                                                                                                                                                        |
| Horibe and Oba, 1972                 |                             | Cultured mollusk <i>Patinopecten yessoensis</i> (Matsuyama Bay, Japan)                | 4.5                          | 23.3    | 17.04    | 4.34 | o        | 0.16  | o                     | -0.20             |                                                                                                                                                                                                                                    |
| Erez and Luz, 1983                   |                             | Cultured <i>Globigerinoides sacculifer</i> (50-90% growth under lab. Conditions)      | 14                           | 30      | 16.998   | 4.52 | o        | 0.028 | o                     |                   | Minor variant in literature                                                                                                                                                                                                        |
| -                                    | Pearson, 2012               | Cultured <i>Globigerinoides sacculifer</i> (50-90% growth under lab. Conditions)      | 14                           | 30      | 17.00    | 4.52 | o        | 0.03  | o                     | -0.22             | Overestimation of temperatures by 2°C                                                                                                                                                                                              |
| Bouvier-Soumagnac and Duplessy, 1985 |                             | <i>Orbulina universa</i> cultured                                                     |                              |         | 16.40    | 4.67 | o        | -     | x                     | -0.20             |                                                                                                                                                                                                                                    |
| Bouvier-Soumagnac and Duplessy, 1985 |                             | <i>Orbulina universa</i> (Indian Ocean)                                               |                              |         | 15.40    | 4.81 | o        | -     | x                     | -0.20             |                                                                                                                                                                                                                                    |
| Grossman and Ku, 1986                |                             | Biogenic aragonite                                                                    | 2.6                          | 22      | 20.60    | 4.34 | o        | -     | x                     | 0.20              |                                                                                                                                                                                                                                    |
| -                                    | Hudson and Anderson, 1989   | Biogenic aragonite                                                                    | 2.6                          | 22      | 19.70    | 4.34 | o        | -     | x                     | -                 | water values cast in terms of VSMOW (Grossman, 2012)                                                                                                                                                                               |
| Kim and O'Neil, 1997                 | Bemis et al., 1998          | Synthetic calcite                                                                     | 10                           | 40      | 16.10    | 4.64 | o        | 0.09  | o                     | -0.27             | Quadratic approximation using a least square regression from the original 1000lna notation, offset of ~ -2°C for photosymbiotic species (if analogous with modern calcification in low-pH microenvironment)                        |
| -                                    | Peeeters et al., 2002       | Synthetic calcite                                                                     | 10                           | 40      | 15.20    | 4.60 | o        | 0.09  | o                     | -0.27             | Quadratic approximation from the original 1000lna notation, offset of ~ -2°C for photosymbiotic species (if analogous with modern calcification in low-pH microenvironment)                                                        |
| -                                    | Grossman 2012               | Synthetic calcite                                                                     | 10                           | 40      | 13.70    | 4.54 | o        | 0.09  | o                     |                   | Quadratic approximation from the original 1000lna notation, using 1000lna = 10.44                                                                                                                                                  |
| Bemis et al., 1998                   |                             | Cultured <i>Orbulina universa</i>                                                     | 15                           | 25      | 14.90    | 4.80 | o        | -     | x                     | -0.27             | High light (HL) = (>380 μEinst m <sup>-2</sup> s <sup>-1</sup> )                                                                                                                                                                   |
| Bemis et al., 1998                   |                             | Cultured <i>Orbulina universa</i>                                                     | 15                           | 25      | 16.50    | 4.80 | o        | -     | x                     | -0.27             | Low Light (LL) = (20-30 μEinst m <sup>-2</sup> s <sup>-1</sup> )                                                                                                                                                                   |
| Bemis et al., 1998                   |                             | Cultured <i>Globigerina bulloides</i> (11-chambered shell)                            | 14.5                         | 24      | 12.60    | 5.07 | o        | -     | x                     | -0.27             | Mass balance relationship, where δ18O values of the first 10 chambers are estimated at the experimental temperature via interpolation of 10-chambered shells collected at 16°C (Spero and Lea, 1996) and 22°C (Bemis et al., 1998) |
| Bemis et al., 1998                   |                             | Cultured <i>Globigerina bulloides</i> (12-chambered shell)                            | 14.5                         | 24      | 13.20    | 4.89 | o        | -     | x                     | -0.27             | Mass balance relationship, where δ18O values of the first 10 chambers are estimated at the experimental temperature via interpolation of 10-chambered shells collected at 16°C (Spero and Lea, 1996) and 22°C (Bemis et al., 1998) |
| Bemis et al., 1998                   |                             | Cultured <i>Globigerina bulloides</i> (13-chambered shell)                            | 14.5                         | 24      | 13.60    | 4.77 | o        | -     | x                     | -0.27             | Mass balance relationship, where δ18O values of the first 10 chambers are estimated at the experimental temperature via interpolation of 10-chambered shells collected at 16°C (Spero and Lea, 1996) and 22°C (Bemis et al., 1998) |
| Lynch-Steglich et al., 1999          |                             | In-situ <i>Cibicides</i> and <i>Planulina</i> (Surface sediments, Little Bahama Bank) | 4.1                          | 25.6    | 16.10    | 4.76 | o        | -     | x                     | -0.27             |                                                                                                                                                                                                                                    |
| -                                    | Cramer et al., 2011         | In-situ <i>Cibicides</i> and <i>Planulina</i> (Surface sediments, Little Bahama Bank) | 4                            | 26      | 16.10    | 4.76 | o        | -     | x                     | -0.27             |                                                                                                                                                                                                                                    |
| Mielke, 2001                         | Spero et al., 2003          | Cultured <i>Globorotalia menardii</i>                                                 | ?                            | ?       | 14.90    | 5.13 | o        | -     | x                     | -0.27             |                                                                                                                                                                                                                                    |
| Spero et al., unpublished            | Spero et al., 2003          | Cultured <i>Globigerinoides sacculifer</i>                                            | ?                            | ?       | 12.00    | 5.57 | o        | -     | x                     | -0.27             | High light (HL)                                                                                                                                                                                                                    |
| Multza et al., 2003                  |                             | In-situ <i>Globigerinoides sacculifer</i>                                             | 16                           | 31      | 14.91    | 4.35 | o        | -     | x                     | -0.27             | High light (HL)                                                                                                                                                                                                                    |

**Figure 1:** Example of a table format for summarizing palaeotemperature calibrations including the calibration temperature minimum and maximum, material and format of the equation. The o and x in (c-sw) and (c-sw)<sup>2</sup> columns denote either their presence or absence from the formula. From Metcalfe (2013).

## Review References

Metcalfe, B. (2013, December 17). Planktonic foraminifera: From production to preservation of the oceanographic signal. Amsterdam, Netherlands: Vrije Universiteit Amsterdam.  
<https://research.vu.nl/en/publications/planktonic-foraminifera-from-production-to-preservation-of-the-oc>
